# Supplementary material
Source: publisher site journal article supplement (https://www.dovepress.com/article/458003)
Supplement: Supplementary file 1 [file get_supplementary_file.php]

**Supplementary Table.** Quality Assessment of Included Studies using Newcastle-Ottawa Scale

| **Author** | **Selection** | | | | **Comparability** | **Outcome** | | **Total** |
| --- | --- | --- | --- | --- | --- | --- | --- | --- |
| **Representativeness of the sample** | **Sample Size** | **Non-respondents** | **Ascertainment of the exposure** | **Comparability of cases and controls** | **Ascertainment of outcome** | **Statistical test** |
| Abd El-Aty et al. 2020 63 | * | * | * | * | Not Applicable | ** | * | 7 |
| Al-Domi et al. 2019 44 | * | * | * | * | Not Applicable | ** | * | 7 |
| Okour et al. 2019 45 | * | * | * | * | Not Applicable | ** | * | 7 |
| Fraiwan et al. 2021 46 | * | * | * | * | Not Applicable | ** | * | 7 |
| Zayed et al. 2018 47 | * | * | * | * | Not Applicable | ** | * | 7 |
| Al-Haifi et al. 2022 52 | * | * | * | * | Not Applicable | ** | * | 7 |
| AlRodhan et al. 2019 53 | * | * | * | * | Not Applicable | ** | * | 7 |
| Salah et al. 2021 54 | * | * | * | * | Not Applicable | ** | * | 7 |
| Al-Lahham et al. 2019 55 | * | * | * | * | Not Applicable | ** | * | 7 |
| Cheema et al. 2022 60 | * | * | * | * | Not Applicable | ** | * | 7 |
| Al-Thani et al. 2022 61 | * | * | * | * | Not Applicable | ** | * | 7 |
| AlEnazi et al. 2023 48 | * | * | * | * | Not Applicable | ** | * | 7 |
| Albaker et al. 2022 49 | * | * | * | * | Not Applicable | ** | * | 7 |
| Al-Hazzaa et al. 2022 50 | * | * | * | * | Not Applicable | ** | * | 7 |
| Almaqhawi et al. 2022 51 | * | * | * | * | Not Applicable | ** | * | 7 |
| Abduelkarem et al. 2020 56 | * | * | * | * | Not Applicable | ** | * | 7 |
| Almulla and Taoufik 2022 57 | * | * | * | * | Not Applicable | ** | * | 7 |
| Hussein et al. 2018 62 | * | * | * | * | Not Applicable | ** | * | 7 |
| Ghobadi et al. 2018 64 | * | * | * | * | Not Applicable | ** | * | 7 |
| Benmohammed et al. 2018 58 | * | * | * | * | Not Applicable | ** | * | 7 |
| Aissaoui 2020 59 | * | * | * | * | Not Applicable | ** | * | 7 |
